# Supplementary material for: Inter-Individual Variation in DNA Methylation Patterns across Two Tissues and Leukocytes in Mature Brahman Cattle
Source: Biology (Basel). 2023 Feb 5;12(2):252. doi: 10.3390/biology12020252 (PMC9953534; doi:10.3390/biology12020252)
Supplement: Supplementary file 1 [file biology-12-00252-s001.zip › SupplementaryTable S1.xlsx]

## Sheet: A
Supplementary Table S1A. List of Biological Pathways and the genes and promoter regions of genes that were identified to be highly variable in the lymphocytes from the Control group
PANTHER Biological Process	Highly Varaible Genes and Promoter Regions Involved
Biological Adhesion	ENSBTAG00000050719, ENSBTAG00000053933
Biological Process Involved in Interspecies Interaction Between Organisms	ENSBTAG00000053521,ENSBTAG00000050878,PI3,ENSBTAG00000020813,CCL25,CCL1,ENSBTAG00000051008
Biological Regulation	ZNF367,ENSBTAG00000053521,OR8B4,ALAS2,GRB7,ZNF35,CARHSP1,ISG12(B),GPR101,BTBD8,LIN7A,ZNF740,GNGT2,OSTN,DMRTC2,CAPG,ENSBTAG00000012132,MOG,RHBG,ZSCAN16,ACTR8,ENSBTAG00000014365,CARF,SUPT16H,PRDX3,ENSBTAG00000010072,ETV3L,ENSBTAG00000005087,CCL25,PTMA
Biomineralization	TMEM119
Cellular Process	ZNF367,SLC36A3,ENSBTAG00000053521,OR8B4,ENSBTAG00000038978,LCA5,ALAS2,GRB7,DGAT2L6,NDNF,ZNF35,LNX1,BLZF1,CENPT,ENSBTAG00000048829,CARHSP1,ISG12(B),GPR101,BTBD8,PCYOX1L,LIN7A,ZNF740,OARD1,GNGT2,SULT1E1,LIX1,MOGAT3,OSTN,KRT75,DMRTC2
Developmental Process	ALAS2,KRT75,DMRTC2,ACTBL2,ETV3L,CEBPE,ENSBTAG00000044066,TMEM119,ACVR1C,MAEL,ACTL9,IL34, DMRTC2,JCAD,TBX15,ENSBTAG00000039873
Immune System Process	ENSBTAG00000052108,ENSBTAG00000053521,ALAS2,ENSBTAG00000050878,PI3, MOG,ENSBTAG00000020813,CCL25,IL2RB,CEBPE, ENSBTAG00000055111,CCL1,IL34,MR1,ENSBTAG00000045810,ENSBTAG00000051008, ENSBTAG00000006864
Localization	SLC36A3,LCA5,ENSBTAG00000046788,BLZF1,LIN7A,BSND,ACTBL2,ENSBTAG00000012132,RHBG,WDR45,CCL25,ENSBTAG00000044066,CCL1,ENSBTAG00000055111,HTR3C,SLC7A3,GABRR3,ENSBTAG00000015061,CHML,ENSBTAG00000011144,ACTL9,RANBP6,DNAJC22,TRAPPC1,NIPAL4,ENSBTAG00000051008,ABCB7
Locomotion	ACTBL2,CCL25,ENSBTAG00000044066,CCL1, ACTL9
Cellular Metabolism	ZNF367,ENSBTAG00000052108,EBP,ALAS2,DGAT2L6,NDNF,ZNF35,LNX1,ENSBTAG00000048829,CARHSP1,BTBD8,PCYOX1L,ZNF740,OARD1,SULT1E1,LIX1,MOGAT3,DMRTC2,MOG,SULT1E1,ZSCAN16,ACTR8,ENSBTAG00000034024,CARF,ENSBTAG00000005395,SUPT16H,PRDX3,ETV3L,WDR45,PTPN18
Multicellular Organismal Process	OR8B4,ALAS2,KRT75,DMRTC2,ACTBL2,MOG,ENSBTAG00000005087,CEBPE,ENSBTAG00000044066,TMEM119,ACVR1C,HTR3C,MAEL,GABRR3,MAEL,ENSBTAG00000052112,ENSBTAG00000051041,ACTL9,IL34,DMRTC2,JCAD,ENSBTAG00000039837,ENSBTAG00000039873
Reproduction	DMRTC2,ENSBTAG00000044066,MAEL,ENSBTAG00000039873
Reproductive Process	DMRTC2,ENSBTAG00000044066,MAEL,ENSBTAG00000039874
Response to Stimulus	ENSBTAG00000052108,ENSBTAG00000053521,OR8B4,ENSBTAG00000050878,GRB7,ISG12(B),GPR101,GNGT2,PI3,OSTN,ENSBTAG00000012132,MOG,ACTR8,ENSBTAG00000014365,PRDX3,ENSBTAG00000010072,ENSBTAG00000020813,ENSBTAG00000005087,CCL25,IL2RB,DRD1,LPIN1,CCL1,ACVR1C,OXGR1,DOK4,HTR3C,UBXN10,GABRR3,ENSBTAG00000052112
Rythmic Process	NR0B2
Signaling	ENSBTAG00000053521,OR8B4,GRB7,ISG12(B),GPR101,LIN7A,GNGT2,OSTN,ENSBTAG00000012132,MOG,ENSBTAG00000014365,DYTN,ENSBTAG00000010072,ENSBTAG00000005087,CCL25,IL2RB,DRD1,CCL1,ACVR1C,OXGR1,DOK4,HTR3C,GABRR3,ENSBTAG00000052112,ENSBTAG00000051041,CSNK1B,TRBV24-1,ENSBTAG00000039837,RGL1,SSR2

## Sheet: B
Supplementary Table S1B. List of Biological Pathways and the genes and promoter regions of genes that were identified to be highly variable in the lymphocytes from the PNS group
PANTHER Biological Process	Highly Varaible Genes and Promoter Regions Involved
Biological Adhesion	TCAM1,DSC1,IL4,ENSBTAG00000055302,ENSBTAG00000048772
Biological Process Involved in Interspecies Interaction Between Organisms	ENSBTAG00000048171,ENSBTAG00000048980,TCAM1,IL36A,ENSBTAG00000014329,IL4,TREM1,ENSBTAG00000020813,WFDC2,TREM1,SLPI
Biological Regulation	PFN3,PFN3,ENSBTAG00000052162,ENSBTAG00000025304,CPLX2,ENSBTAG00000051041,IMPACT,MOG,STAT6,OXGR1,NONO,ENSBTAG00000040380,CARF,MAEL,JCAD,ENSBTAG00000048980,TCAM1,ENSBTAG00000010072,DSC1,CFAP206,PLSCR1,CREB3L2,XKR9,MRGPRG,ANKRD2,ANAPC1,PHKG1,GNAT2,IQGAP2,GPHA2,IL36A
Cellular Process	ZNF518B,ENSBTAG00000004596,SLC38A8,HMGN4,ERAL1,ARHGEF25,PEX3,ADAD1,ENSBTAG00000017443,TENT5D,EAF2,ENSBTAG00000052703,ABRA,GIGYF1,TPPP2,MSTN,PARP6,ENSBTAG00000052771,CBX3,TXNDC9,SLC38A11,ENSBTAG00000046109,DMRTA1,MICU1,NDNF,ENSBTAG00000053109,ASIP,MTFR1,APEX2,STAT6
Developmental Process	PFN3,PFN3,ENSBTAG00000052162,ENSBTAG00000025304,CPLX2,ENSBTAG00000051041,IMPACT,MOG,STAT6,OXGR1,NONO,ENSBTAG00000040380,CARF,MAEL,JCAD,ENSBTAG00000048980,TCAM1,ENSBTAG00000010072,DSC1,CFAP206,PLSCR1,CREB3L2,XKR9,MRGPRG,ANKRD2,ANAPC1,PHKG1,GNAT2,IQGAP2,GPHA2,IL36A
Immune System Process	MOG,ENSBTAG00000048980,TCAM1,IL36A,IL9R,ENSBTAG00000014329,IL4,ENSBTAG00000052108,TREM1,CXCR2,ENSBTAG00000052841,TMEM176B,CXCR2,"BOLA,BoLA",IL34,ENSBTAG00000006864,ENSBTAG00000020813,WFDC2,ENSBTAG00000023563,TREM1,SLPI,ENSBTAG00000036102,"BoLA
Localization	CPLX2,LAMP2,ENSBTAG00000048171,PRM3,NIPAL4,ENSBTAG00000048980,CLIC2,CFAP206,PLSCR1,XKR9,OTOP1,SLC38A8,SNAPIN,FGF23,ENSBTAG00000048711,MRC1,COPZ2,SLC2A5,DYNLL1,KCNAB3,IL4,STRA6,ARL1,TREM1,CXCR2,ENSBTAG00000053018,CXCR2,MICU1,APOC4,RANBP6
Locomotion	ENSBTAG00000048171,PRM3,ENSBTAG00000048980,IL4,TREM1,CXCR2,TREM1
Metabolic Process	ENSBTAG00000052162,ENSBTAG00000051758,ENSBTAG00000008635,LAMP2,IMPACT,MOG,STAT6,NONO,TTLL6,ENSBTAG00000039994,HBM,ENSBTAG00000049518,ENSBTAG00000040380,IDNK,CARF,MAEL,ENTPD5,TCAM1,RNASE1,CREB3L2,ANKRD2,ANAPC1,SULT1B1,UBE4A,ENSBTAG00000016520,IL36A,PRPSAP2,ZBTB18,XPA,CARF
Multicellular Organismal Process	ENSBTAG00000051041,MOG,MAEL,JCAD,CRYBB3,TCAM1,DSC1,GNAT2,OTOP1,FGF23,IL4,ERMN,TREM1,ENSBTAG00000053018,ENSBTAG00000052841,TMEM176B,MAEL,IL34,ENSBTAG00000023563,RTP1,TREM1
Pigmentation	ENSBTAG00000048711
Reproduction	PRM3,MAEL,ZP4
Reproduction Process	PRM3,MAEL,ZP4
Response to Stimulus	ENSBTAG00000025304,LAMP2,ENSBTAG00000051041,ENSBTAG00000048171,MOG,STAT6,OXGR1,ENSBTAG00000040380,ENSBTAG00000048980,TCAM1,ENSBTAG00000010072,MRGPRG,PHKG1,GNAT2,UBE4A,GPHA2,IL36A,XPA,ENSBTAG00000053109,IL9R,GHE4,GCNT2,FGF23,NEPRO,ENSBTAG00000014329,ENSBTAG00000051147,DEDD2,IL4,ENSBTAG00000023192,TRAF6
Signaling	ENSBTAG00000025304,CPLX2,ENSBTAG00000051041,MOG,STAT6,OXGR1,ENSBTAG00000048980,TCAM1,ENSBTAG00000010072,DSC1,MRGPRG,PHKG1,GNAT2,DYTN,GPHA2,IL36A,DRP2,ENSBTAG00000053109,SNAPIN,IL9R,GHE4,GCNT2,FGF23,NEPRO,ENSBTAG00000051147,DEDD2,IL4,ENSBTAG00000023192,TRAF6,SSR2

## Sheet: C
Supplementary Table S1C. List of Biological Pathways and the genes and promoter regions of genes that were identified to be highly variable in the anterior pituitary from the Control group
PANTHER Biological Process	Highly Varaible Genes and Promoter Regions Involved
Biological Adhesion	CD28, IL4,ENSBTAG00000050757,ENSBTAG00000019227,SELL
Biological Process Involved in Interspecies Interaction Between Organisms	CLEC7A,GBP4,OAS1Y,ENSBTAG00000010155,ENSBTAG00000052422,WFDC10A,IL1B,ENSBTAG00000020813,CCL25,ENSBTAG00000051187,ENSBTAG00000052384,IL4,IL36A,WFDC15B
Biological Regulation	ICA1L,CLEC7A,MSTN,SSTR3,RAD9B,GPB5,GNRHR,ENSBTAG00000054034,ENSBTAG00000046135,GUF1,ERAS,OAS1Y,ENSBTAG00000038204,ENSBTAG00000001873,ENSBTAG00000010155,ZWINT,CD28,ENSBTAG00000036102,ENSBTAG00000053300,ENSBTAG00000047699,RNFT1,SSTR2,ZSCAN16,GABRA2,SYT4,PRDX3,ENSBTAG00000010852,IL1B,CAPZA3,TSSK3
Biological Phase	RAD9B
Cellular Process	GSTA5,ENSBTAG00000003529,ADAD1,ENSBTAG00000017443,CLEC7A,TRMT12,MSTN,ENSBTAG00000002943,TXNDC9,SSTR3,ENSBTAG00000017978,RAD9B,NDNF,ENSBTAG00000000237,TRMT10B,GPB5,TBP,ENSBTAG00000020532,GNRHR,SLC38A1,ENSBTAG00000017770,ENSBTAG00000054034,ACOT2,ENSBTAG00000046135,GUF1,OARD1,ERAS,GEMIN2,CPSF3,OAS1Y
Developmental Process	CLEC7A,ACTBL2,UCMA,RAG2,CRYBA1,PTCD2
Growth	CLEC7A
Immune System Process	CLEC7A,ENSBTAG00000010155,CD28,ENSBTAG00000036102,WFDC10A,ENSBTAG00000010852,ENSBTAG00000020813,CCL25,ENSBTAG00000051734,ENSBTAG00000050136,ENSBTAG00000052384,ENSBTAG00000025812,IL4,RAG2,ENSBTAG00000023563,ENSBTAG00000050757,ENSBTAG00000007618,IL36A,WFDC15B,SELL
Localization	ICA1L,CLEC7A,SLC38A1,AP4S1,ENSBTAG00000010155,ZWINT,ACTBL2,ENSBTAG00000036102,ENSBTAG00000053300,SEC63,ENSBTAG00000052422,GABRA2,SYT4,GOLGA5,CCL25,ABCD2,SDHD,ENSBTAG00000034871,NIPA2,CNGA4,IL4,GABRA6,ENSBTAG00000040461,ENSBTAG00000051376,ENSBTAG00000025283,SELL,TRAM1L1
Locomotion	CLEC7A,ENSBTAG00000010155,ACTBL2,ENSBTAG00000052422,CCL25,IL4,SELL
Metobolic Process	GSTA5,ENSBTAG00000003529,ADAD1,ENSBTAG00000017443,CLEC7A,TRMT12,MSTN,ENSBTAG00000002943,ENSBTAG00000023535,RAD9B,NDNF,ENSBTAG00000000237,TRMT10B,TBP,ENSBTAG00000020532,ENSBTAG00000017770,ENSBTAG00000054034,ACOT2,ENSBTAG00000046135,GUF1,OARD1,GEMIN2,CPSF3,OAS1Y,ENSBTAG00000038204,ENSBTAG00000001873,ENSBTAG00000050815,SULT1E1,WDR3,ENSBTAG00000052014
Multicellular Organismal Process	CLEC7A,ACTBL2,GABRA2,ENSBTAG00000010852,ENSBTAG00000038267,IL33,UCMA,IL4,RAG2,ENSBTAG00000023563,CRYBA1,GABRA6,ENSBTAG00000052112,ENSBTAG00000007618,PTCD2
Response to Stimulus	GSTA5,CLEC7A,MSTN,SSTR3,RAD9B,GPB5,GBP4,GNRHR,ERAS,OAS1Y,ENSBTAG00000038204,ENSBTAG00000010155,ZWINT,ENSBTAG00000006546,CD28,ENSBTAG00000053300,ENSBTAG00000047699,RNFT1,SSTR2,ENSBTAG00000052422,GABRA2,SYT4,PRDX3,WFDC10A,ENSBTAG00000010852,IL1B,ENSBTAG00000020813,TSSK3,ENSBTAG00000038267
Signaling	MSTN,SSTR3,RAD9B,GPB5,GNRHR,ERAS,ENSBTAG00000038204,ENSBTAG00000010155,ZWINT,CD28,ENSBTAG00000053300,SSTR2,GABRA2,SYT4,ENSBTAG00000010852,IL1B,TSSK3,ENSBTAG00000038267,CCL25,ENSBTAG00000005429,PRP9,ENSBTAG00000051600,ENSBTAG00000023192,ENSBTAG00000054045,IL4,ENSBTAG00000047919,OXGR1,P2RY12,ENSBTAG00000023563,IL11RA

## Sheet: D
Supplementary Table S1D. List of Biological Pathways and the genes and promoter regions of genes that were identified to be highly variable in the anterior pituitary from the Prenatally Stressed group
PANTHER Biological Process	Highly Varaible Genes and Promoter Regions Involved
Biological Adhesion	DSG3,ENSBTAG00000050510,ENSBTAG00000050757,CLDN1,ENSBTAG00000019227,ENSBTAG00000038532,SELL
Biological Process Involved in Interspecies Interaction Between Organisms	ENSBTAG00000052703,OAS1Y,ENSBTAG00000020813,CCL25,ENSBTAG00000039476,CCL14,ENSBTAG00000053508
Biological Regulation	EAF2,ENSBTAG00000052703,MSTN,PARP6,DMRTA1,ENSBTAG00000053109,ASIP,BOLA,GNRHR,ISG12(B),ENSBTAG00000030838,OAS1Y,C6orf52,DENND4A,ZWINT,ADH6,ENSBTAG00000048711,ENSBTAG00000036102,HNF4G,RNFT1,COX7A2,ENSBTAG00000051107,CPLX2,IL2RG,ENSBTAG00000014365,SYT4,SUPT16H,PRDX3
Cellular Process	PEX3,ADAD1,ENSBTAG00000017443,EAF2,ENSBTAG00000052703,MSTN,PARP6,TXNDC9,SLC38A11,ENSBTAG00000046109,DMRTA1,NDNF,ENSBTAG00000053109,ASIP,APEX2,SLC25A31,ENSBTAG00000034138,PIGB,BOLA,ENSBTAG00000020532,GNRHR,EMC2,ISG12(B),ENSBTAG00000030838,ACOT2,OARD1,OAS1Y,TTR,C6orf52,PGK1
Developmental Process	DMRTA1,HNF4G,DPPA3,ENSBTAG00000053776,FBXO45,ERMN,SLITRK6,ENSBTAG00000048602,ENSBTAG00000026249
Immune System Process	ENSBTAG00000052108,ENSBTAG00000052703,BOLA,ENSBTAG00000036102,SLAMF6,ENSBTAG00000020813,CCL25,ENSBTAG00000010458,ENSBTAG00000048304,ENSBTAG00000039476,CCL14,ENSBTAG00000053508,ENSBTAG00000050757,MR1,SELL,STAP1,ENSBTAG00000004815
Localization	PEX3,SLC38A11,ENSBTAG00000046788,SLC25A31,AP4S1,ZWINT,ENSBTAG00000048711,ENSBTAG00000036102,COX7A2,CPLX2,SYT4,GOLGA5,CCL25,ENSBTAG00000047514,ENSBTAG00000036224,TIMM17B,ENSBTAG00000039555,CCL14,ENSBTAG00000053508,SNAP23,ENSBTAG00000040461,LZTFL1,WAPL,PLSCR2,ENSBTAG00000048602
Locomotion	CCL25,CCL14,SELL
Metobolic Process	ENSBTAG00000052108,ADAD1,ENSBTAG00000017443,EAF2,ENSBTAG00000052703,MSTN,PARP6,ENSBTAG00000046109,DMRTA1,NDNF,ASIP,APEX2,ENSBTAG00000034138,PIGB,ENSBTAG00000020532,ENSBTAG00000030838,ACOT2,OARD1,OAS1Y,TTR,C6orf52,PGK1,SULT1E1,TAF13,ENSBTAG00000010270,ADH6,CLNS1A,FUNDC1,ENSBTAG00000051758,CWF19L1
Multicellular Organismal Process	CLEC3A,ENSBTAG00000051107,DPPA3,ENSBTAG00000053776,FBXO45,ENSBTAG00000048304,ERMN,TFF1,TAS2R8,SLITRK6,ENSBTAG00000048602,ENSBTAG00000038532
Pigmentation	ASIP,ENSBTAG00000048711
Reproduction & Reproduction Process	DMRTA1,ENSBTAG00000053776,ENSBTAG00000038532
Response to Stimulus	ENSBTAG00000052108,ENSBTAG00000052703,MSTN,PARP6,ENSBTAG00000046109,ENSBTAG00000053109,APEX2,BOLA,GNRHR,ISG12(B),OAS1Y,DENND4A,ZWINT,ADH6,RNFT1,ENSBTAG00000051107,IL2RG,ENSBTAG00000014365,SYT4,PRDX3,CETN4,ENSBTAG00000020813,CCL25,DGKH,PRP2,ENSBTAG00000000582,TSSK4,TRHR,ENSBTAG00000048304
Signaling	ENSBTAG00000052703,MSTN,PARP6,ENSBTAG00000053109,GNRHR,ISG12(B),DENND4A,ZWINT,ENSBTAG00000051107,CPLX2,IL2RG,ENSBTAG00000014365,SYT4,CCL25,DGKH,PRP2,ENSBTAG00000000582,TSSK4,TRHR,ENSBTAG00000048304,ENSBTAG00000007901,ENSBTAG00000039476,GPR1,OXGR1,ENSBTAG00000038981,CCL14,ENSBTAG00000053508,SNAP23,CSNK1B

## Sheet: E
Supplementary Table S1E. List of Biological Pathways and the genes and promoter regions of genes that were identified to be highly variable in the amygdala from the Control group
PANTHER Biological Process	Highly Varaible Genes and Promoter Regions Involved
Biological Adhesion	FERMT2,C15H11orf34
Biological Process Involved in Interspecies Interaction Between Organisms	TF,ENSBTAG00000053508,CLEC6A,
Biological Regulation	ZNF518B,ENSBTAG00000004596,TENT5D,ABRA,TPPP2,CBX3,FGF7,ENSBTAG00000024731,PLAA,SLC39A6,PTAFR,ENSBTAG00000036102,ENSBTAG00000054164,RHBG,SERPINE3,CBX3,SYT4,ENSBTAG00000010852,ENSBTAG00000010072,CDKN2C,TRNAU1AP,ZFHX2,DCP1A,RBM12B,ZNF114,MOB1B,EED,TFR2,TBC1D12,HELLS
Cellular Process	ENSBTAG00000004596,ARHGEF25,TENT5D,ABRA,TPPP2,CBX3,MTFR1,FGF7,MAU2,RPL14,EXOC3L1,DHDDS,ENSBTAG00000024731,RBM17,PLAA,IDNK,METTL11B,MRPS24,CTU2,SLC39A6,PTAFR,ENSBTAG00000036102,RHBG,SERPINE3,CBX3,NPM3,SYT4,ENSBTAG00000010852,ENSBTAG00000010072
Growth	C15H11orf34
Developmental Process	ARHGEF25,FGF7,ZFHX2,C15H11orf34,PTCD2
Immune System Process	TF,ENSBTAG00000036102,ENSBTAG00000010852,HELLS,ENSBTAG00000053508,ENSBTAG00000005615,CLEC6A,
Localization	FGF7,EXOC3L1,ENSBTAG00000024731,SLC39A6,TF,ENSBTAG00000036102,RHBG,SYT4,ZDHHC9,SLC2A3,TFR2,RAB8B,ENSBTAG00000053508,ENSBTAG00000055305,RAB8B,EXOC3L1,CASQ1,SCN4A,C15H11orf34,DNLZ,SLC2A3,CFL2,TF,KCNA1
Locomotion	ARHGEF25,FGF7,ZFHX2,C15H11orf34,CFL2
Metobolic Process	ZNF518B,ENSBTAG00000004596,CPA4,TENT5D,ABRA,CBX3,HYAL1,MTFR1,FGF7,DHDDS,RBM17,PLAA,IDNK,METTL11B,MRPS24,CTU2,ENSBTAG00000054164,SERPINE3,CBX3,ENSBTAG00000010852,ENSBTAG00000016748,SUV39H1,SUV39H1,CDKN2C,METTL16,TRNAU1AP,ZFHX2,ENSBTAG00000032944,GAR1,ZDHHC9
Multicellular Organismal Process	ARHGEF25,FGF7,ENSBTAG00000010852,ZFHX2,CASQ1,SCN4A,PTCD2
Reproduction & Reproduction Process	PLCZ1
Response to Stimulus	ENSBTAG00000004596,ARHGEF25,ABRA,FGF7,ENSBTAG00000024731,TF,PTAFR,SYT4,ENSBTAG00000010852,ENSBTAG00000010072,MOB1B,RAB8B,ENSBTAG00000053508,FRMD1,CASQ1,C15H11orf34,ENSBTAG00000005615,CLEC6A,CHRM5,GPR68,ENSBTAG00000051147
Signaling	ABRA,FGF7,ENSBTAG00000024731,PTAFR,SYT4,ENSBTAG00000010852,ENSBTAG00000010072,MOB1B,ENSBTAG00000053508,FRMD1,CASQ1,SCN4A,ENSBTAG00000005615,CHRM5,ENSBTAG00000051147

## Sheet: F
Supplementary Table S1F. List of Biological Pathways and the genes and promoter regions of genes that were identified to be highly variable in the amygdala from the Prenatally Stressed group.
PANTHER Biological Process	Highly Varaible Genes and Promoter Regions Involved
Biological Adhesion	CLDN15,BOLA-DRA,CLDN15
Biological Process Involved in Interspecies Interaction Between Organisms	TLR4,CCL16,TLR4,ENSBTAG00000054561,ENSBTAG00000046076
Biological Regulation	FOSL1,TLR4,MAP2K5,ATP5IF1,ERBIN,MS4A18,SERPINF2,TRAT1,MCHR2,CCNH,CARF,POU2F2,GPBAR1,NANOG,OLFML1,CCL16,ENSBTAG00000051085,ENSBTAG00000005559,ZNF711,SESN3,CSMD3,IFI6,TCL1A,GABRA1,DLGAP4,LAMTOR3,TLR4,SLITRK3,BOLA-DRA,CARF
Cellular Process	MGAT4C,FOSL1,ELMO1,TLR4,IPO9,CLDN15,MAP2K5,APEX2,ENSBTAG00000050110,RPL26,RNF186,ATP5IF1,ERBIN,SULT1C2,TSR2,MS4A18,SERPINF2,TRAT1,MCHR2,ENSBTAG00000008020,CCNH,CARF,ENSBTAG00000051637,POU2F2,GPBAR1,NANOG,UFM1,OLFML1,CCL16,ENSBTAG00000051085
Developmental Process	TDRD5,CSMD3,ENSBTAG00000054953,SLITRK3,
Immune System Process	TLR4,TRAT1,CCL16,ZNF711,BOLA-DRA,ENSBTAG00000054561,TRAT1,C4A,ENSBTAG00000046076
Localization	ELMO1,IPO9,ENSBTAG00000050110,ERBIN,TRAT1,ENSBTAG00000008020,CCL16,KCNB2,PEX19,GABRA1,SLC7A3,HIP1R,RANBP6,TRAPPC1,SNAPIN,TRAT1,DZIP1,ENSBTAG00000046076,SLC28A2
Locomotion	ELMO1,CCL16
Metobolic Process	MGAT4C,FOSL1,APEX2,RPL26,RNF186,ATP5IF1,SULT1C2,TSR2,SERPINF2,TRAT1,ENSBTAG00000008020,CCNH,CARF,ENSBTAG00000051637,POU2F2,NANOG,UFM1,ENSBTAG00000051085,ENSBTAG00000005559,CYP2C19,ZNF711,LOX,SESN3,PAPOLB,ACMSD,TCL1A,PIH1D2,FBP2,ZMAT2,MRPS14
Multicellular Organismal Process	TDRD5,CLEC3A,ZNF711,CSMD3,GABRA1,DLGAP4,ENSBTAG00000054953,SLITRK3,TDRD5,SLC28A2
Reproduction & Reproduction Process	TDRD5
Response to Stimulus	TLR4,ENSBTAG00000050005,MAP2K5,APEX2,MS4A18,TRAT1,MCHR2,GPBAR1,OLFML1,CCL16,CYP2C19,SESN3,IFI6,GABRA1,DLGAP4,LAMTOR3,TLR4,APEX2,BOLA-DRA,RNF5,PAQR7,ENSBTAG00000054561,ENSBTAG00000017204,TRAT1,C4A,ENSBTAG00000046076,VRK1,NPY1R
Signaling	TLR4,MAP2K5,MS4A18,TRAT1,MCHR2,GPBAR1,OLFML1,CCL16,SESN3,IFI6,GABRA1,DLGAP4,LAMTOR3,TLR4,SNAPIN,TRAT1,ENSBTAG00000017204,ENSBTAG00000046076,ENSBTAG00000046076,NPY1R
